# Supplementary material for: Structural, energetic and dynamic investigation of poly(ethylene oxide) in imidazolium-based ionic liquids with different cationic structures
Source: Royal Society of Chemistry journal article supplement (doi:10.1039/d3cp01946b), 2023-01-01
Supplement: d3cp01946b1.pdf [file d3cp01946b1.pdf]

# **Structural, Energetic and Dynamic Investigation of Poly(ethylene oxide) in Imidazolium-Based Ionic Liquids with Different Cationic Structures**

Yongjie Dan<sup>1</sup>, Huan Luo<sup>2</sup>, Pengjian Gong<sup>1</sup>, Dadong Yan<sup>3</sup>, Yanhua Niu<sup>1,\*</sup>, Guangxian  
Li<sup>1,\*</sup>

*<sup>1</sup>College of Polymer Science and Engineering, State Key Laboratory of Polymer  
Materials Engineering of China, Sichuan University, Chengdu 610065, China;*

*<sup>2</sup>School of Automation, Chengdu University of Information Technology, Chengdu,  
China*

*<sup>3</sup>Department of Physics, Beijing Normal University, Beijing 100875, China*

\*Corresponding author. Tel: 86-28-85401841; Fax: 86-28-85401841.

E-mail: [yhniu@scu.edu.cn](mailto:yhniu@scu.edu.cn); [guangxianli@scu.edu.cn](mailto:guangxianli@scu.edu.cn)

Submitted to *Physical Chemistry Chemical Physics* to the editor

## SUPPORTING

**Table S1.** Composition of each PEO/IL system for simulated

| System           | Chains' Number | Cations' Number | Anions' Number |
|------------------|----------------|-----------------|----------------|
| PD <sub>10</sub> | 38             | 13              | 26             |
| PD <sub>20</sub> | 36             | 27              | 54             |
| PD <sub>30</sub> | 35             | 45              | 90             |
| PD <sub>40</sub> | 28             | 55              | 110            |
| PD <sub>50</sub> | 25             | 76              | 152            |
| PD <sub>60</sub> | 21             | 96              | 192            |
| PD <sub>70</sub> | 17             | 120             | 240            |
| PD <sub>80</sub> | 12             | 141             | 282            |
| PD <sub>90</sub> | 7              | 185             | 370            |
| PM <sub>30</sub> | 35             | 91              | 91             |
| PM <sub>50</sub> | 25             | 152             | 152            |
| PM <sub>70</sub> | 17             | 241             | 241            |

**Table S2.** Comparison between simulated and experimental densities ( $\rho$ ) for MIL and DIL at room temperature

| configuration                                           | $\rho_{Simu}(\text{g/cm}^3)$ | $\rho_{Exp}(\text{g/cm}^3)^1$ | Dev.  |
|---------------------------------------------------------|------------------------------|-------------------------------|-------|
| [C <sub>3</sub> mim] [TFSI]                             | 1.543                        | 1.476                         | 4.54% |
| [C <sub>6</sub> (mim) <sub>2</sub> ][TFSI] <sub>2</sub> | 1.607                        | 1.546                         | 3.95% |

(a) Five initial configurations of PEO<sub>3</sub>/MIL from MD trajectories:

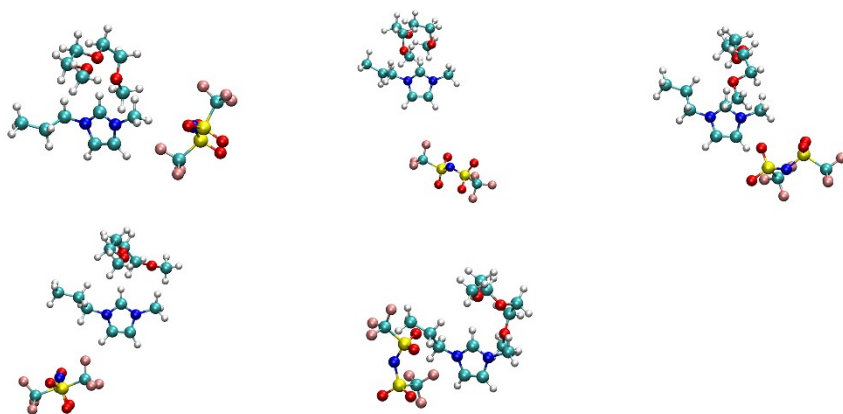

(b) Five initial configurations of PEO<sub>3</sub>/DIL from MD trajectories:

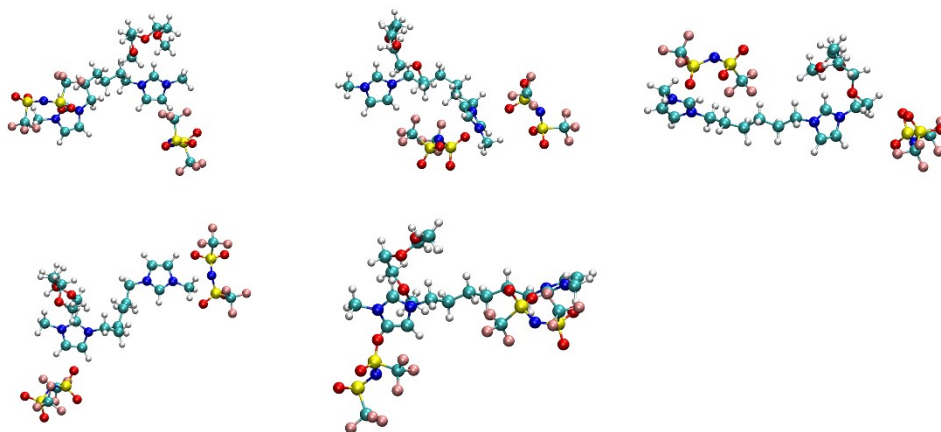

**Figure S1.** The initial configurations of each PEO/IL pairs derived from our MD simulation trajectories

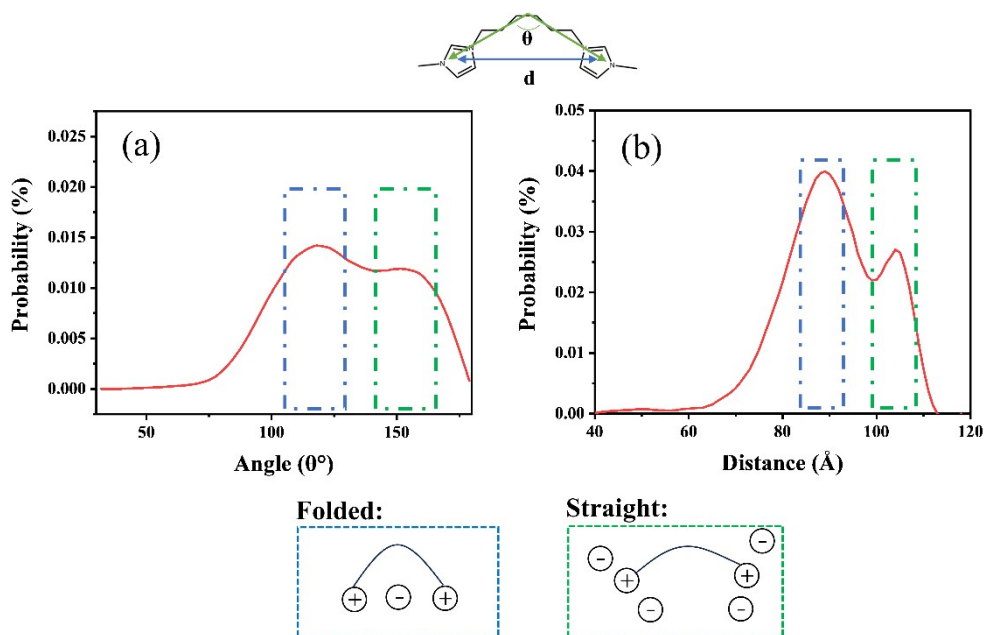

**Figure S2.** (a) Distribution of the angle formed by two vectors pointing from the center atom of linkage chain to the imidazolium rings and (b) the distance between two imidazolium rings of DIL in PD<sub>50</sub> at 373K and 1 atm.

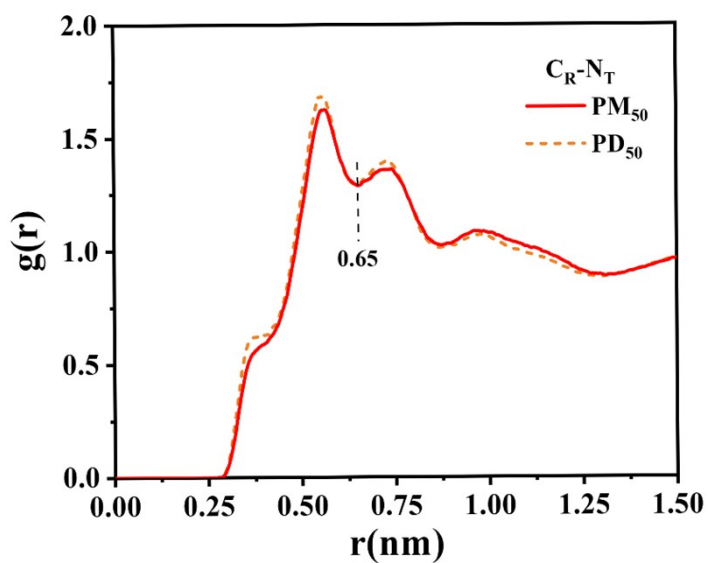

**Figure S3.** Radial distribution functions for  $C_R$  and  $N_T$  atoms of different ions in PM<sub>50</sub> and PD<sub>50</sub> systems at 373K and 1 atm .

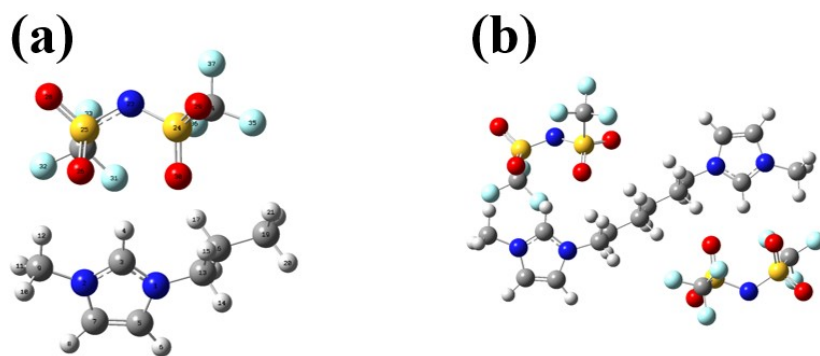

**Figure S4.** Structures of (a) MIL and (b) DIL optimized at B3LYP/(6-31G\* + 6-31+G\*)

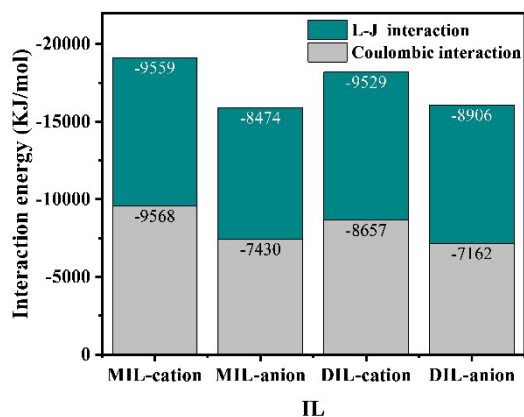

**Figure S5.** Interaction energies of different ions with PEO in PM<sub>50</sub> or PD<sub>50</sub> at 373K and 1 atm

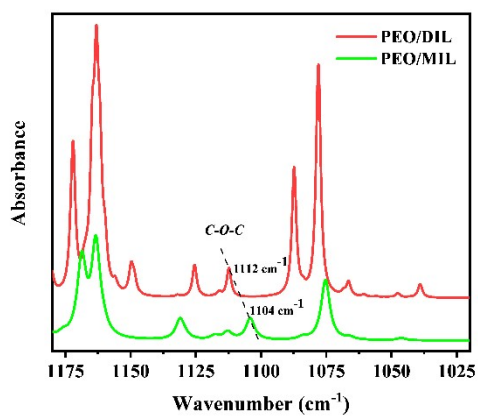

**Figure S6.** The vibrational spectra of PEO/MIL and PEO/DIL from DFT calculation

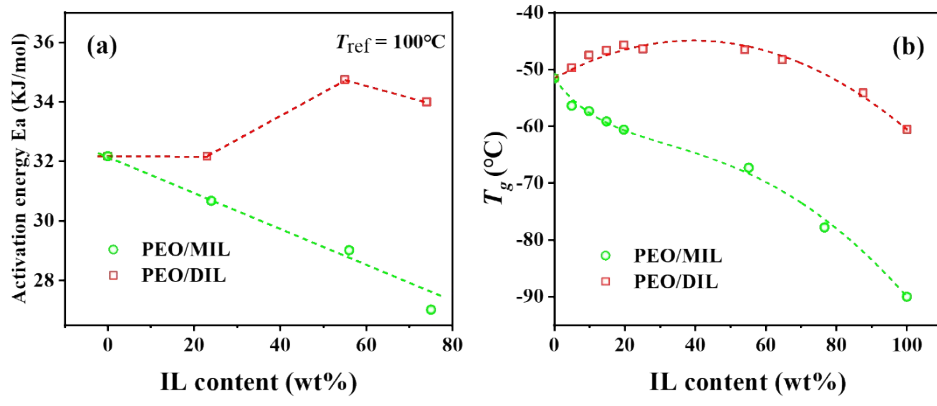

**Figure S7.** The activation energy  $E_a$  value and (b) glass transition temperature of PEO/ILs mixtures at different ILs content<sup>2</sup>.

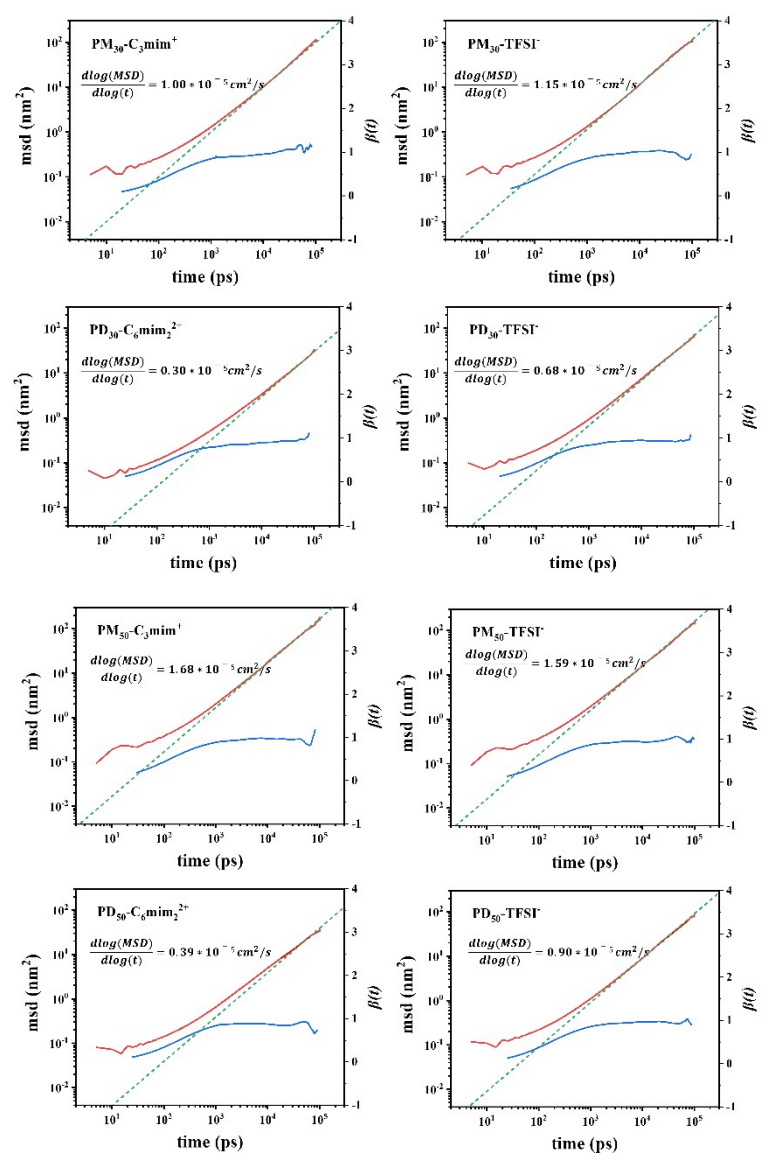

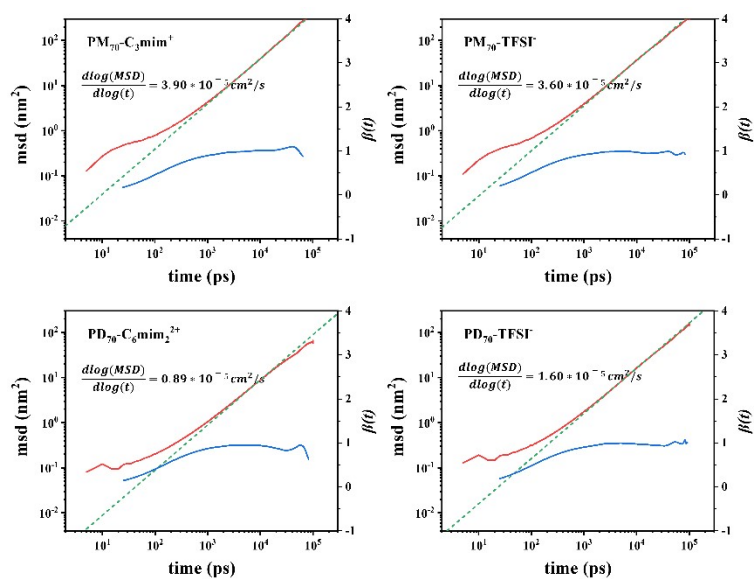

**Figure S8.** Mean square displacements (MSDs) of cations and anions calculated by

100 ns MD trajectories for PM<sub>50</sub> and PD<sub>50</sub> at 373 K and 1 atm.

$$\beta(t) = \frac{d \log(\text{MSD})}{d \log(t)}$$

changes (blue line) versus time were plotted to find the linear region of the MSD curve (red line) with a slope of 1.

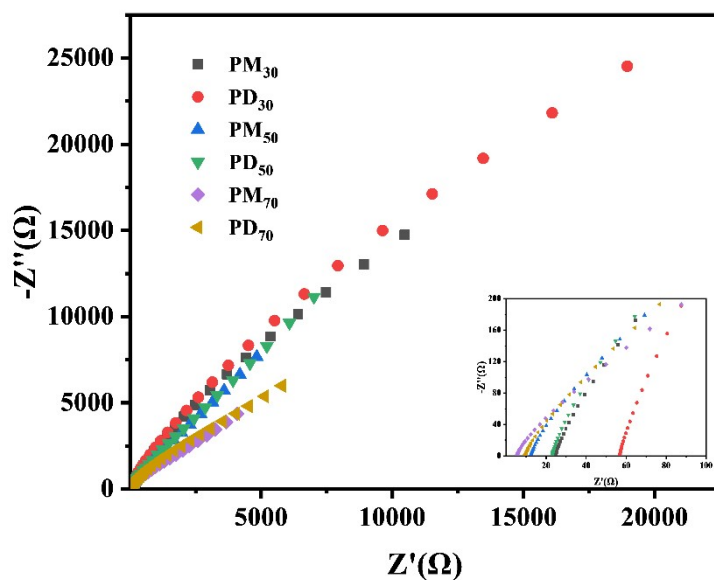

**Figure S9.** Nyquist plots of PEO/ILs systems with different MIL or DIL concentrations at 373 K

## References

1. H. Shirota, T. Mandai, H. Fukazawa and T. Kato, *J. Chem. Eng. Data*, 2011, **56**, 2453-2459.
2. H. Luo, X. He, W. Li, Y. Niu and G. Li, *Macromolecules*, 2022, **55**, 4589-4599.
